# Supplementary material
Source: Springer Nature journal article supplement (https://www.springermedizin.de/resource/supplementary/12916_2009_214_MOESM8_ESM.pdf/9599408)

**Id, Sex, Study name**

**Relative Risk  
95% CI**

**Relative Risk  
95% CI**

**USA**

**2 F NHANES I**

**6.80 (1.60, 28.50)**

**3 M CPS-I**

**1.08 (0.64, 1.83)**

**6 M CPS-II**

**1.77 (1.14, 2.74)**

**20 M Williams and Horm 1977**

**0.69 (0.47, 1.00)**

**Subtotal (95% CI)**

**1.38 (0.72, 2.64)**

**SCANDINAVIA**

**11 M Norway Cohorts**

**0.80 (0.61, 1.05)**

**13 M Swedish construction workers**

**0.70 (0.60, 0.70)**

**Subtotal (95% CI)**

**0.71 (0.66, 0.76)**

**Total (95% CI)**

**0.99 (0.71, 1.37)**

0.10 0.20 1.00 5.00 10.00

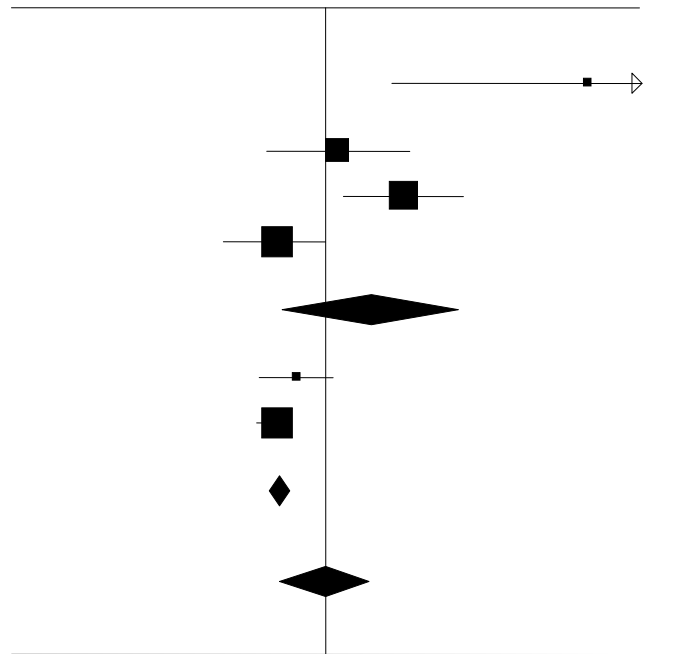

Supplement: MOESM8 [file 9599408]
